# Supplementary material for: Stable Li-ion storage in Ge/N-doped carbon microsphere anodes
Source: Royal Society of Chemistry journal article supplement (doi:10.1039/d0nr08804h), 2021-01-01
Supplement: d0nr08804h1.pdf [file d0nr08804h1.pdf]

## Supporting Information

### Stable Li-ion storage in Ge/N-doped Carbon Microspheres Anodes

Lijing Han,<sup>a,b</sup> Jing Tang,<sup>b</sup> Rong Yang,<sup>a</sup> Qiaohua Wei,<sup>a,b\*</sup> Mingdeng Wei<sup>a\*</sup>

<sup>a</sup> Fujian Key Laboratory of Electrochemical Energy Storage Materials, Fuzhou University, Fuzhou, Fujian 350002, China

<sup>b</sup> Ministry of Education Key Laboratory for Analytical Science of Food Safety and biology, Fujian Key Laboratory of Analysis and Detection Technology for Food Safety, Fuzhou University, Fuzhou, Fujian 350002, China

\*Corresponding authors.

*E-mail addresses:*

wei-mingdeng@fzu.edu.cn (Mingdeng Wei);

qhw76@fzu.edu.cn (Qiaohua Wei)

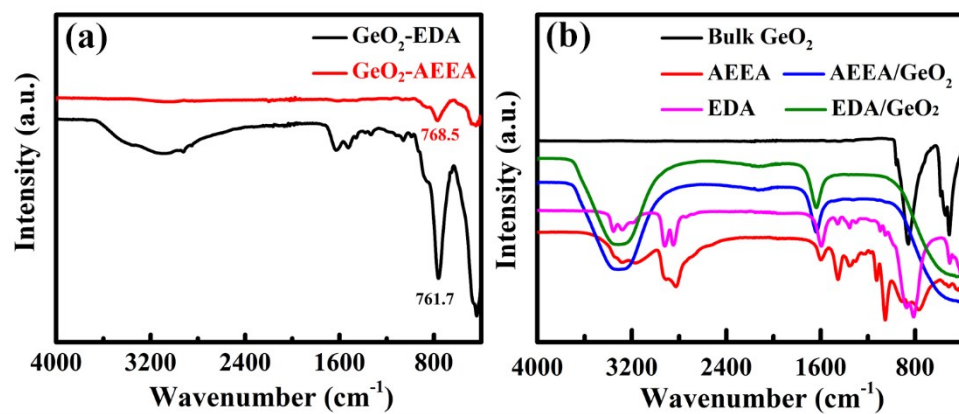

Fig. S1 FTIR spectra of the samples.

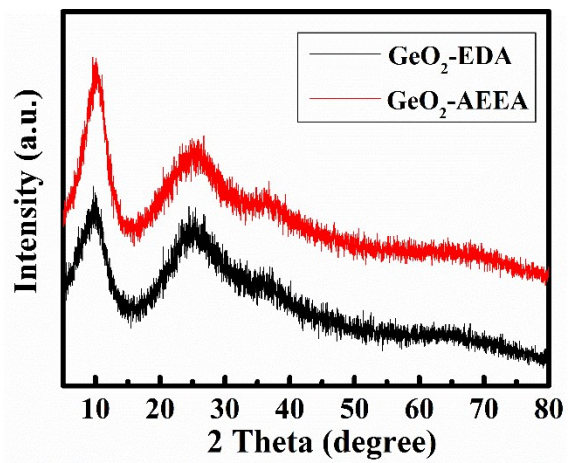

**Fig. S2** XRD patterns of GeO<sub>2</sub>-EDA and GeO<sub>2</sub>-AEEA precursors.

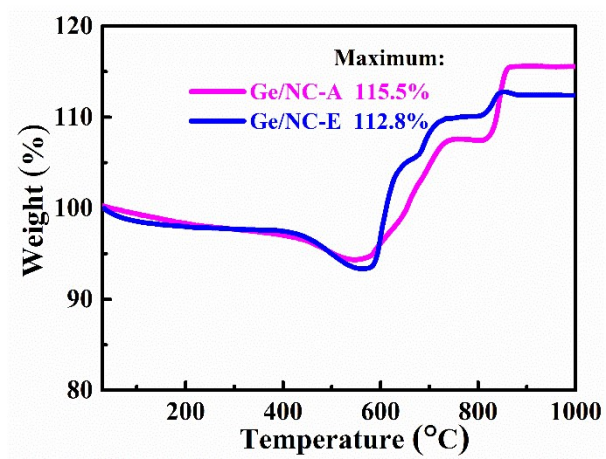

**Fig. S3** Thermogravimetric analysis (TGA) of Ge/NC-A and Ge/NC-E in air at the heating rate of  $10\text{ }^{\circ}\text{C min}^{-1}$ .

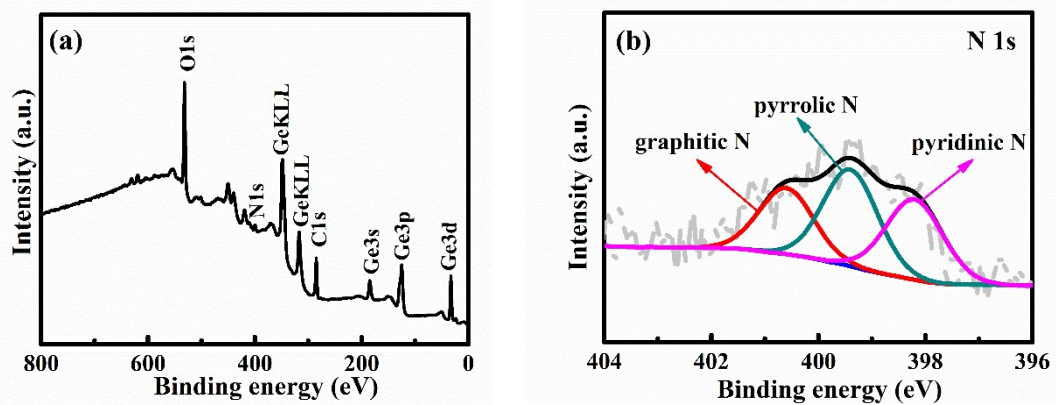

**Fig. S4** (a) Typical XPS survey spectrum, and (b) High-resolution N 1s XPS spectrum of Ge/NC-A.

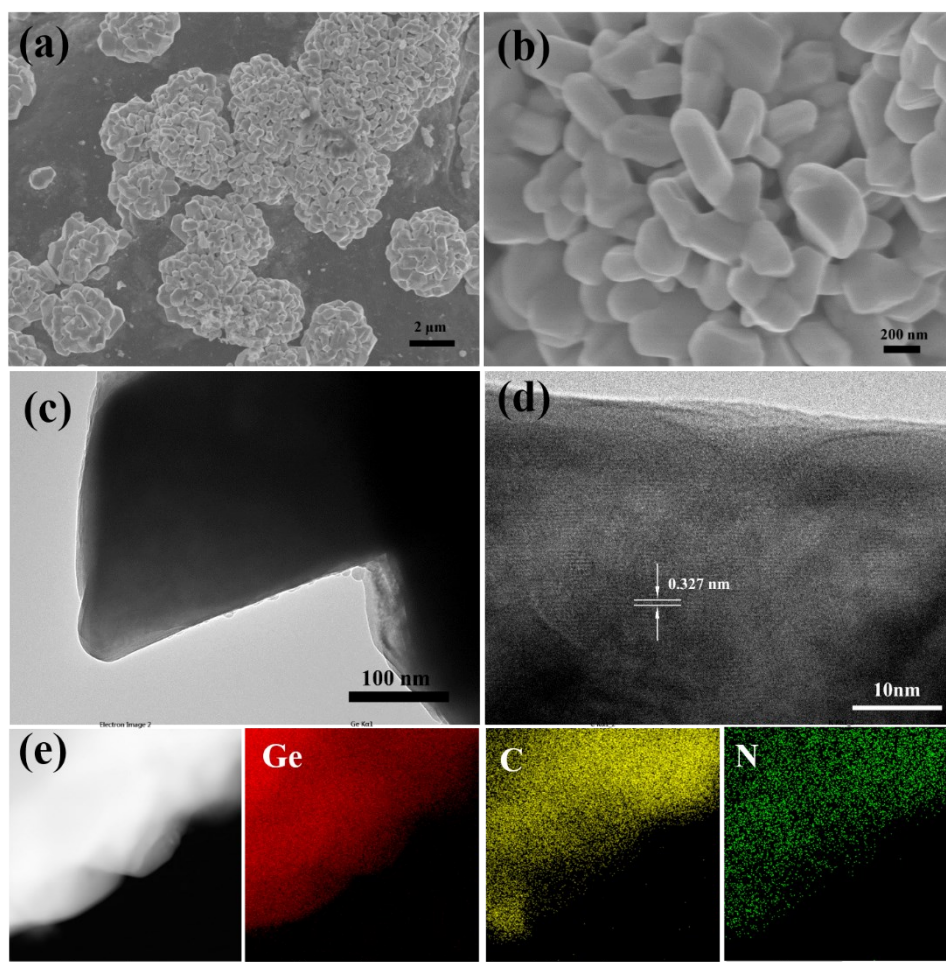

**Fig. S5** (a, b) SEM images, (c-d) TEM images and HRTEM image of the Ge/NC-E microspheres, and (e) Elemental mapping images of Ge, C and N.

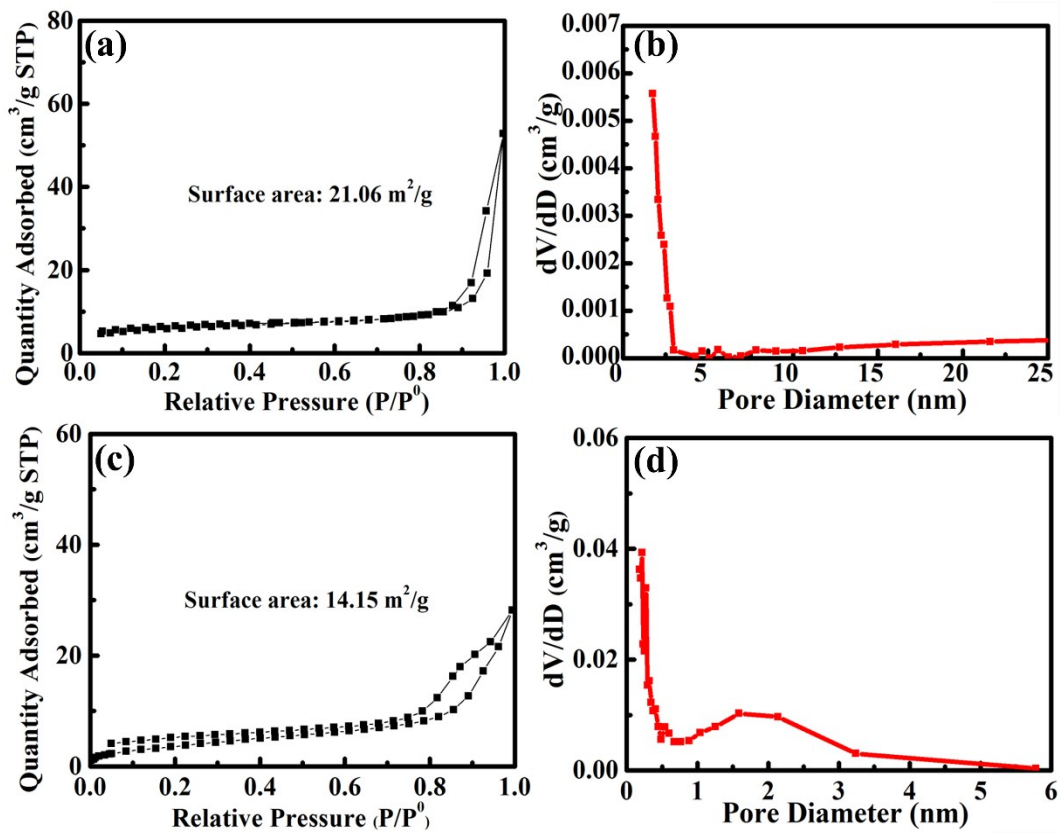

**Fig. S6** N<sub>2</sub> adsorption-desorption isotherms and pore size distributions from the adsorption branch through the BJH method of (a, b) Ge/NC-A and (c, d) Ge/NC-E.

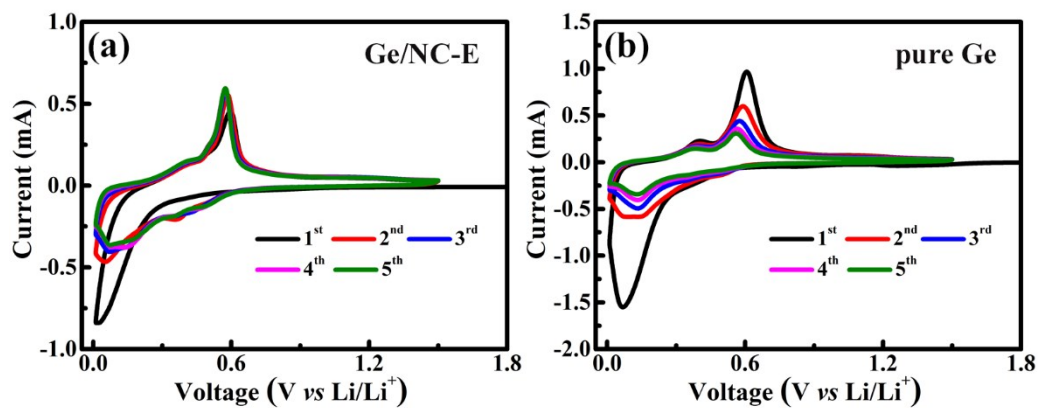

**Fig. S7** CV curves at a scan rate of 0.2 mV s<sup>-1</sup> for Ge/NC-E and pure Ge.



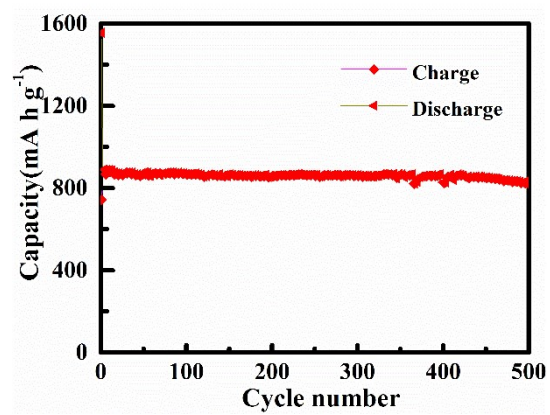

**Fig. S8** Long-term cycling performance at a current density of 5 A g<sup>-1</sup> for Ge/NC-A.

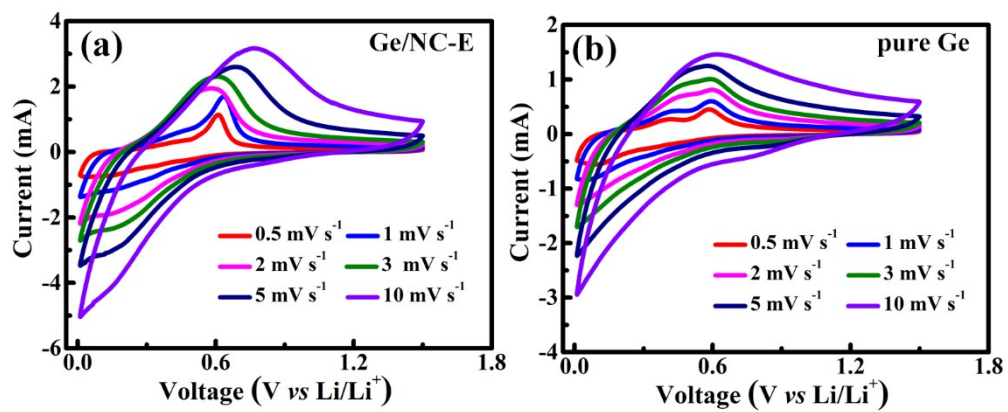

**Fig. S9** CV curves of the Ge/NC-E and pure Ge anode at various scan rates from 0.5 to 10 mV s<sup>-1</sup>.

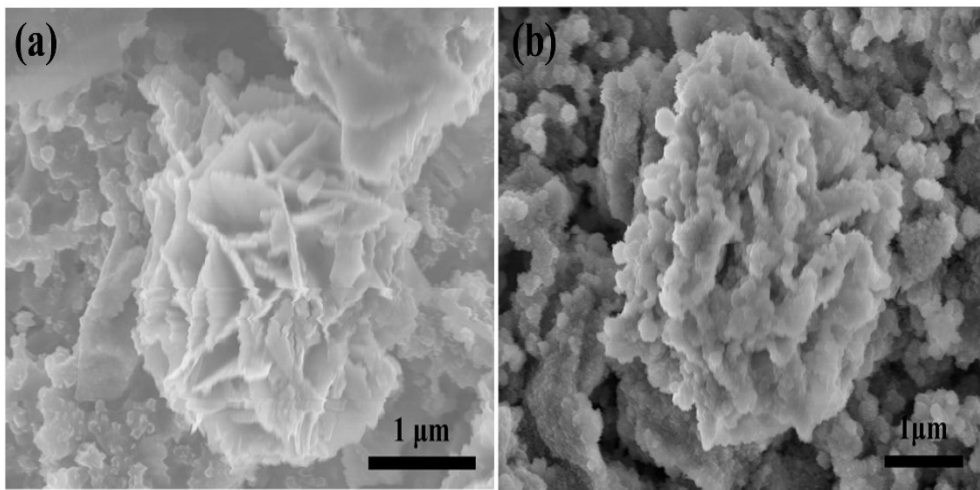

**Fig. S10** The SEM images of Ge/NC-A anode (a) before and (b) after cycling.

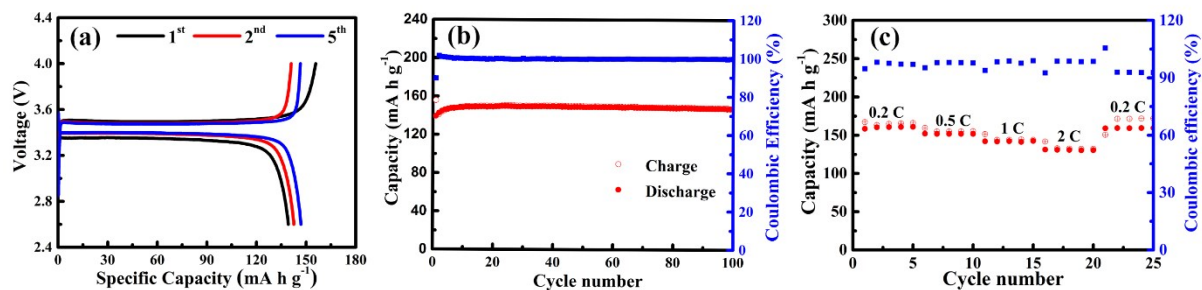

**Fig. S11** Electrochemical performances of LiFePO<sub>4</sub> cathode in half-cell: (a) discharge-charge curves, (b) cycle life at current density of 0.5 C and (c) rate performance (1 C = 170 mA h g<sup>-1</sup>).

**Table S1.** Comparison of electrochemical properties of Ge-C anodes.

| Anode                     | Cycle stability                       |                             |                                         | Ref.                                                 |
|---------------------------|---------------------------------------|-----------------------------|-----------------------------------------|------------------------------------------------------|
|                           | Current Density (mA g <sup>-1</sup> ) | After n <sup>th</sup> cycle | Charge Capacity (mA h g <sup>-1</sup> ) |                                                      |
| 3DOP Ge@N-C               | 1                                     | 200                         | 1145                                    | <i>Adv. Funct. Mater.</i> <b>2020</b> , 30, 2000373. |
| Ge@NC                     | 1.6                                   | 1000                        | 917                                     | <i>Chem. Eng. J.</i> <b>2019</b> , 360, 1301.        |
|                           | 8                                     | 400                         | 806                                     |                                                      |
| Ge-C spheres              | 1.6                                   | 860                         | 980                                     | <i>ACS Nano</i> <b>2019</b> , 13, 9511.              |
| Ge-C framework            | 0.1                                   | 50                          | 833.6                                   | <i>Adv. Energy Mater</i> <b>2019</b> , 9, 1900081.   |
|                           | 1                                     | 3000                        | 618.3                                   |                                                      |
| Ge/OMC-N-S                | 2                                     | 1000                        | 641                                     | <i>Electrochim. Acta</i> <b>2019</b> , 318, 737.     |
| Ge@G@TiO <sub>2</sub> NFs | 0.1                                   | 100                         | 1050                                    | <i>Adv. Funct. Mater.</i> <b>2016</b> , 26, 1104.    |
| Ge@C                      | 0.5                                   | 150                         | 878.1                                   | <i>Chem. Eng. J.</i> <b>2017</b> , 322, 188.         |
| H-Ge@NC                   | 1                                     | 300                         | 1067                                    | <i>J. Electroanal. Chem.</i> <b>2019</b> , 832, 182. |
| Ge/NC                     | 0.2                                   | 200                         | 1113.2                                  | This work                                            |
|                           | 1                                     | 1000                        | 965.0                                   |                                                      |
|                           | 5                                     | 500                         | 823.1                                   |                                                      |

**Table S2.** Impedance parameters of Ge and Ge/NC electrodes after 100 cycling at fully charge state.

| <b>Sample<br/>(after cycling)</b> | <b>Re (<math>\Omega</math>)</b> | <b>Rf (<math>\Omega</math>)</b> | <b>Rct (<math>\Omega</math>)</b> |
|-----------------------------------|---------------------------------|---------------------------------|----------------------------------|
| <b>Ge</b>                         | 5.736                           | 45.36                           | 95.16                            |
| <b>Ge/NC-E</b>                    | 1.447                           | 25.31                           | 56.88                            |
| <b>Ge/NC-A</b>                    | 1.368                           | 24.81                           | 49.02                            |
